# Supplementary material for: Investigating the response of cuproproteins from oysters (Crassostrea gigas) after waterborne copper exposure by metallomic and proteomic approaches
Source: Royal Society of Chemistry journal article supplement (doi:10.1039/c3mt00375b), 2014-01-01
Supplement: c3mt00375b.pdf [file c3mt00375b.pdf]

## Electronic Supplementary Information

### Investigating the response of cuproproteins from oyster (*Crassostrea gigas*) after waterborne copper exposure by metallomic and proteomic approaches

Ming Xu,<sup>a</sup> Hugues Bijoux,<sup>b</sup> Patrice Gonzalez,<sup>b</sup> Sandra Mounicou<sup>\*a</sup>

<sup>a</sup> CNRS/UPPA, Laboratoire de Chimie Analytique Bio-inorganique et Environnement, UMR5254, Hélioparc, 2 av. Pr. Angot, F-64053 Pau, France

<sup>b</sup> EA, Université Bordeaux 1, UMR EPOC 5805, Place du Docteur Bertrand Peyneau, 33120 Arcachon

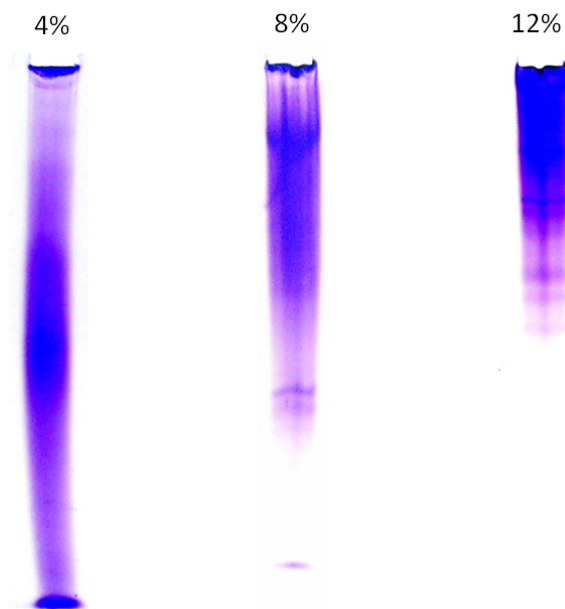

**Fig. S1** Three polyacrylamide gels (4%, 8% and 12%) were compared for separating the digestive gland cytosols of oyster.

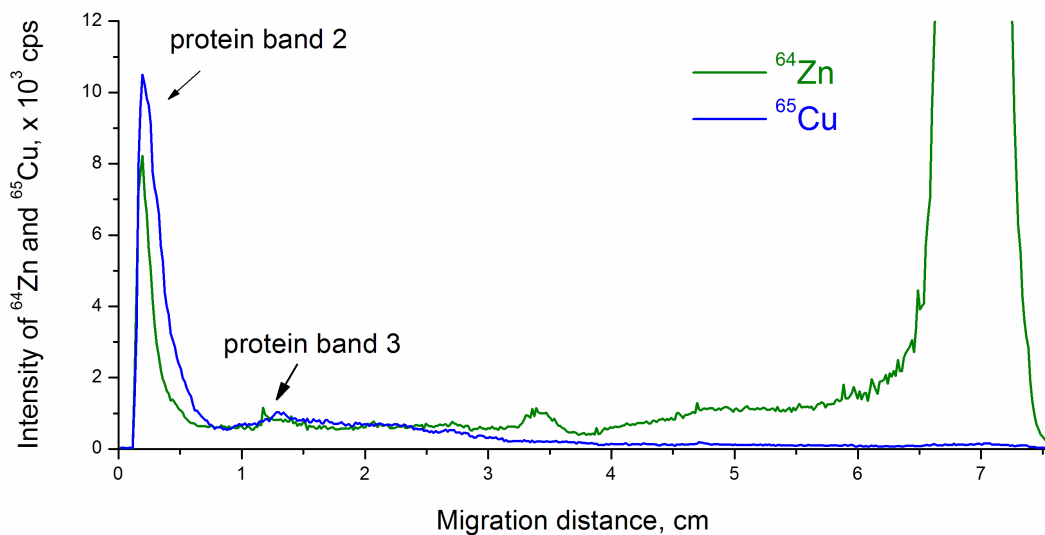

**Fig. S2** <sup>65</sup>Cu and <sup>64</sup>Zn ND-PAGE-LA-ICP MS electropherograms of digestive gland cytosol from Cu-exposed oysters. The peaks marked with arrows respectively correspond to the protein band 2 and 3 in Fig. 3b and 3c. 8% polyacrylamide gel was used for separation.

**Table S1.** Proteins identified by ND-PAGE and  $\mu$ RPC-ESI-MS/MS. <sup>a</sup>

| Protein band <sup>b</sup> | No. | NCBI accession no. | Protein <sup>c</sup>                       | Score | Sequence coverage | Identified peptides |
|---------------------------|-----|--------------------|--------------------------------------------|-------|-------------------|---------------------|
| 1                         | 1   | gi 405972837       | Retinal dehydrogenase 1                    | 246   | 22%               | 9                   |
|                           | 2   | gi 405964580       | Actin                                      | 125   | 25%               | 9                   |
|                           | 3   | gi 405978782       | Nucleoside diphosphate kinase B            | 123   | 21%               | 3                   |
|                           | 4   | gi 405970056       | Kyphoscoliosis peptidase                   | 104   | 15%               | 2                   |
|                           | 5   | gi 405956273       | Amidase                                    | 49    | 9%                | 4                   |
|                           | 6   | gi 40643026        | Ferritin                                   | 42    | 14%               | 2                   |
|                           | 7   | gi 405960663       | Extracellular superoxide dismutase [Cu-Zn] | 27    | 20%               | 2                   |
| 2                         | 1   | gi 405972837       | Retinal dehydrogenase 1                    | 746   | 38%               | 25                  |
|                           | 2   | gi 405964580       | Actin                                      | 638   | 42%               | 13                  |
|                           | 3   | gi 56603668        | alpha-tubulin                              | 162   | 12%               | 3                   |
|                           | 4   | gi 405962873       | Filamin-C                                  | 130   | 4%                | 11                  |
|                           | 5   | gi 405960663       | Extracellular superoxide dismutase [Cu-Zn] | 117   | 13%               | 2                   |
|                           | 6   | gi 44885729        | Arginine kinase                            | 113   | 11%               | 2                   |
|                           | 7   | gi 53801335        | beta-tubulin                               | 100   | 11%               | 3                   |
|                           | 8   | gi 405961263       | Phosphoenolpyruvate carboxykinase [GTP]    | 80    | 10%               | 5                   |
|                           | 9   | gi 405970056       | Kyphoscoliosis peptidase                   | 65    | 15%               | 2                   |
|                           | 10  | gi 46359620        | Elongation factor 1 alpha                  | 52    | 5%                | 2                   |
|                           | 11  | gi 4838561         | Heat shock protein 70                      | 50    | 4%                | 2                   |
|                           | 12  | gi 405975242       | Calponin-2                                 | 41    | 3%                | 2                   |
| 3                         | 1   | gi 405972837       | Retinal dehydrogenase 1                    | 959   | 40%               | 28                  |
|                           | 2   | gi 405957058       | Glyceraldehyde 3-phosphate dehydrogenase   | 353   | 43%               | 12                  |
|                           | 3   | gi 405977320       | Neural cell adhesion molecule 1            | 334   | 14%               | 10                  |
|                           | 4   | gi 405966217       | Prostaglandin reductase 1                  | 225   | 9%                | 3                   |
|                           | 5   | gi 405978782       | Nucleoside diphosphate kinase B            | 222   | 28%               | 4                   |

|    |              |                                                        |     |     |    |
|----|--------------|--------------------------------------------------------|-----|-----|----|
| 6  | gi 405965686 | Cell adhesion molecule 4                               | 219 | 14% | 4  |
| 7  | gi 405970867 | Enolase                                                | 192 | 4%  | 3  |
| 8  | gi 405978716 | Alpha-actinin, sarcomeric                              | 177 | 8%  | 6  |
| 9  | gi 405950795 | Non-neuronal cytoplasmic intermediate filament protein | 170 | 15% | 8  |
| 10 | gi 405956520 | Putative aminopeptidase                                | 167 | 15% | 8  |
| 11 | gi 405973112 | Aspartate aminotransferase                             | 159 | 30% | 11 |
| 12 | gi 405973252 | Fructose-bisphosphate aldolase                         | 157 | 33% | 8  |
| 13 | gi 405976102 | Omega-crystallin                                       | 147 | 11% | 2  |
| 14 | gi 405970056 | Kyphoscoliosis peptidase                               | 137 | 10% | 2  |
| 15 | gi 405963822 | UPF0663 transmembrane protein C17orf28                 | 107 | 6%  | 4  |
| 16 | gi 405965163 | Beta-hexosaminidase subunit beta                       | 104 | 14% | 5  |
| 17 | gi 405959834 | Catalase                                               | 98  | 17% | 3  |
| 18 | gi 405964580 | Actin                                                  | 82  | 26% | 8  |
| 19 | gi 405971457 | Natterin-3                                             | 78  | 42% | 6  |
| 20 | gi 405951523 | Ubiquitin                                              | 69  | 34% | 4  |
| 21 | gi 405968187 | L-ascorbate oxidase                                    | 64  | 4%  | 3  |
| 22 | gi 405975242 | Calponin-2                                             | 62  | 3%  | 2  |
| 23 | gi 405966618 | Carbonic anhydrase 2                                   | 60  | 6%  | 2  |
| 24 | gi 4838561   | Heat shock protein 70                                  | 59  | 3%  | 2  |
| 25 | gi 405967652 | Hypothetical protein CGI_10017178                      | 45  | 4%  | 2  |

<sup>a</sup> NCBI database; <sup>b</sup> Protein band in **Fig. 3**; <sup>c</sup> Taxonomy is restricted to *Crassostrea gigas*.
